# Supplementary material for: Psychiatric Symptoms and Frequency of Eating out among Commuters in Beijing: A Bidirectional Association?
Source: MDPI journal article supplement (doi:10.3390/nu14204221), 2022-10-11

**Psychiatric Symptoms and Frequency of Eating Out among Commuters in Beijing: a Bidirectional Association? Ling Zhang et al. Online Supplementary Material.**

Supplementary Figure S1. Participant Flow Chart according to the STROBE statement

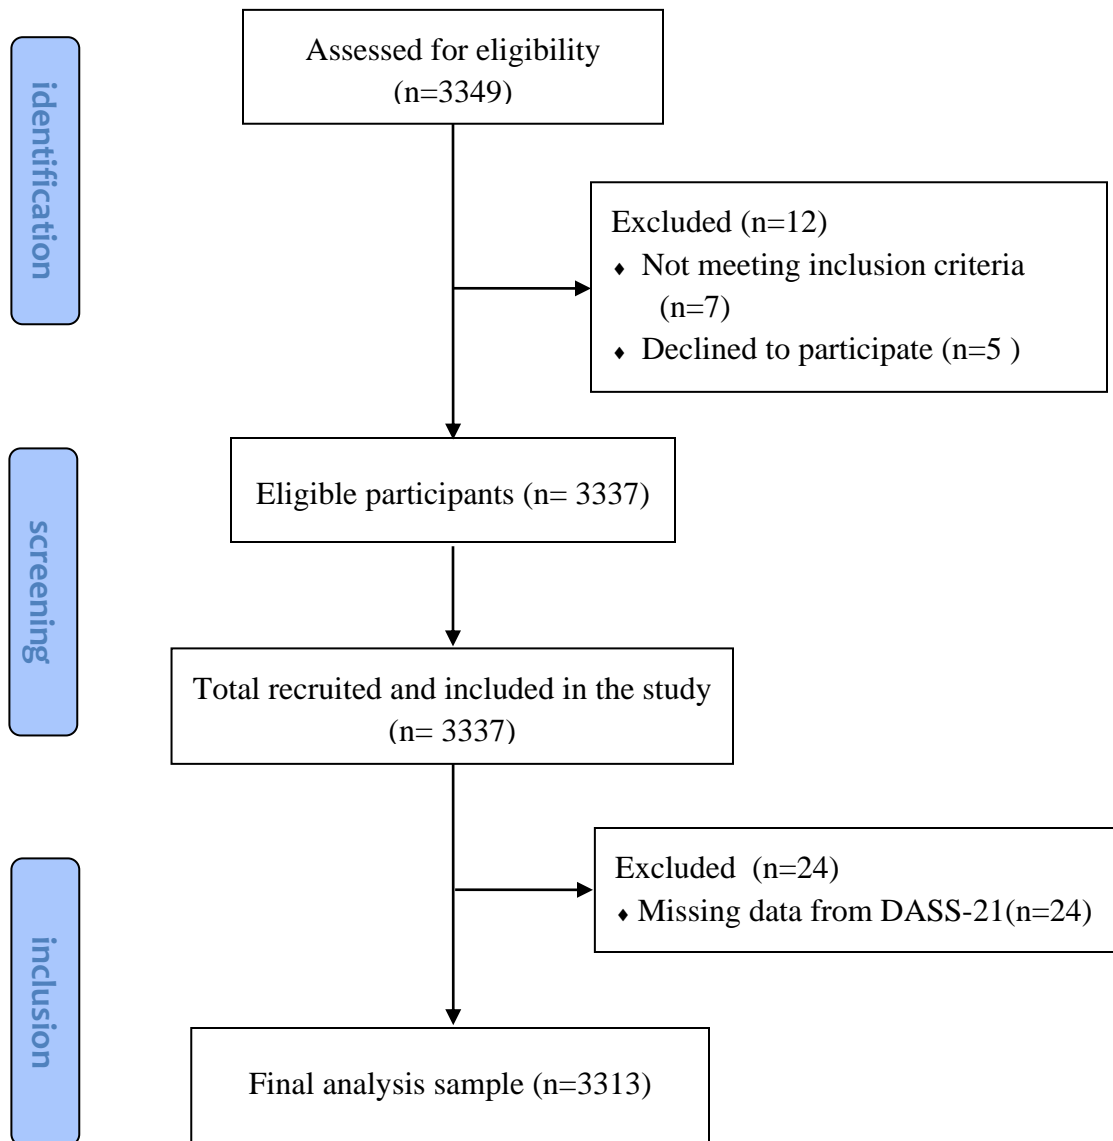

Supplement: s1 [file s1]
